# Supplementary material for: Nitrogen input 15 N signatures are reflected in plant 15 N natural abundances in subtropical forests in China
Source: Copernicus journal article supplement (doi:10.5194/bg-14-2359-2017), 2017-05-10
Supplement: Supplementary file 1 [file bg-14-2359-2017-supplement.pdf]

Supplement of Biogeosciences, 14, 2359–2370, 2017  
<http://www.biogeosciences.net/14/2359/2017/>  
doi:10.5194/bg-14-2359-2017-supplement  
© Author(s) 2017. CC Attribution 3.0 License.

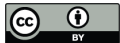

*Supplement of*

## **Nitrogen input $^{15}\text{N}$ signatures are reflected in plant $^{15}\text{N}$ natural abundances in subtropical forests in China**

**Geshere Abdisa Gurmesa et al.**

*Correspondence to:* Jiangming Mo (mojm@scib.ac.cn)

The copyright of individual parts of the supplement might differ from the CC-BY 3.0 licence.

Table S1. Mean concentration (mg N/L) of  $\text{NH}_4^+$ -N and  $\text{NO}_3^-$ -N in precipitation, throughfall, surface runoff and soil solution below 20 cm sampled from September 2012 to February 2013. Numbers in parenthesis for throughfall and soil solution indicate standard error of the mean (SE) ( $n = 3$ ).

| Fluxes         | <u>Broad-leaved forest (BF)</u> |                    |           | <u>Pine forest (PF)</u> |                    |            |
|----------------|---------------------------------|--------------------|-----------|-------------------------|--------------------|------------|
|                | $\text{NH}_4^+$ -N              | $\text{NO}_3^-$ -N | DIN       | $\text{NH}_4^+$ -N      | $\text{NO}_3^-$ -N | DIN        |
| Precipitation* | 2.9                             | 1.2                | 4.1       | 2.9                     | 1.2                | 4.1        |
| Throughfall    | 4.3 (0.6)                       | 2.6 (0.3)          | 7.0 (0.8) | 4.4 (0.4)               | 2.0 (0.3)          | 6.4 (0.6)  |
| Surface runoff | 2.5 (0.5)                       | 4.4 (0.3)          | 6.8 (0.2) | 5.1 (1.2)               | 5.2 (1.0)          | 10.2 (0.3) |
| Soil solution  | 2.0 (0.2)                       | 7.4 (1.2)          | 9.4 (1.2) | 2.7 (0.4)               | 5.2 (0.3)          | 7.8 (0.6)  |

\*Precipitation was collected at open area within the reserve, and was assumed to be the same for both forests

Table S2. Calculation of the amount of added N incorporated into plant N pools in the broad-leaved (BF) and pine forest (PF).

| Mass balance formula (Nadelhoffer and Fry, 1994)                                                                                                                                                                                        |         |        |                           |                             |                                  |                                                                                         |                      |
|-----------------------------------------------------------------------------------------------------------------------------------------------------------------------------------------------------------------------------------------|---------|--------|---------------------------|-----------------------------|----------------------------------|-----------------------------------------------------------------------------------------|----------------------|
| $^{15}\text{N}_{\text{rec}} = m_{\text{pool}} (\text{atom } \%^{15}\text{N}_{\text{pool}} - \text{atom } \%^{15}\text{N}_{\text{ref}}) \div (\text{atom } \%^{15}\text{N}_{\text{tracer}} - \text{atom } \%^{15}\text{N}_{\text{ref}})$ |         |        |                           |                             |                                  | $^{15}\text{N}_{\text{rec}} = \% \text{ of added N recovered}$                          |                      |
|                                                                                                                                                                                                                                         |         |        |                           |                             |                                  | $m_{\text{pool}} = \text{N pool in N plots}$                                            |                      |
|                                                                                                                                                                                                                                         |         |        |                           |                             |                                  | $\text{atom } \%^{15}\text{N}_{\text{pool}} = \text{delta } ^{15}\text{N in N-plots}$   |                      |
|                                                                                                                                                                                                                                         |         |        |                           |                             |                                  | $\text{atom } \%^{15}\text{N}_{\text{ref}} = \text{delta } ^{15}\text{N in control}$    |                      |
|                                                                                                                                                                                                                                         |         |        |                           |                             |                                  | $\text{atom } \%^{15}\text{N}_{\text{tracer}} = \text{delta } ^{15}\text{N of added N}$ |                      |
|                                                                                                                                                                                                                                         |         |        |                           |                             |                                  |                                                                                         |                      |
| Forest type                                                                                                                                                                                                                             | Control | N-plot | N pool in N-plots (kg/ha) | Total mass of added (kg/ha) | delta <sup>15</sup> N of added N | Amount of added N recovered (kg/ha)                                                     | % of added recovered |
| BF                                                                                                                                                                                                                                      | -3.92   | -3.25  | 372.37                    | 500                         | -0.71                            | 76.74                                                                                   | 15.3                 |
| PF                                                                                                                                                                                                                                      | -5.30   | -3.61  | 228.73                    |                             |                                  | 72.93                                                                                   | 14.6                 |
